# Supplementary material
Source: publisher figshare collection journal article supplement (https://asha.figshare.com/articles/dataset/_/25016471)
Supplement: Supplementary file 1 [file 1]

**Supplemental Material S1.** TTS per frequency for the 17 participants of the pilot study. All participants were exposed to 15' or 30' of the same pop-rock playlist, at 100 or 97 dB A, respectively. Levels of exposure, self-reported comfort level during music exposure (1 = *extremely uncomfortable*, 10 = *very comfortable*), any type of tinnitus/buzzing in the ears, and aural fullness immediately after music exposure (1 = *no aural fullness*, 10 = *sensation of complete blockage*) are also reported. Trial ID corresponds to the part of the study (1 = *first part and initial audio material*, 2 = *second part with further manipulated audio material*).

| ID | TRIAL ID | TINNITUS DURATION (MIN) | AURAL FULLNESS | COMFORT LEVEL | EXPOSURE (DB A) | TTS1 | TTS3 | TTS4 | TTS6 | TTS8 | TTS10 | TTS12.5 |
|----|----------|-------------------------|----------------|---------------|-----------------|------|------|------|------|------|-------|---------|
| 1  | 1        | 1                       | 3              | 7             | 97              | 10   | 6    | n/a  | 0    | 2    | 0     | -8      |
| 2  | 1        | 0                       | 2              | 5             | 97              | -8   | 12   | n/a  | 26   | 14   | 4     | 6       |
| 3  | 1        | 0                       | 10             | 3             | 100             | -2   | 2    | n/a  | -4   | 0    | -2    | -6      |
| 4  | 1        | 0                       | 10             | 1             | 100             | 4    | 0    | n/a  | 0    | 0    | 6     | 24      |
| 5  | 1        | 0                       | 8              | 6             | 100             | 6    | 10   | n/a  | 0    | -2   | 2     | -8      |
| 6  | 1        | 0                       | 8              | 6             | 100             | 0    | 2    | n/a  | -10  | 2    | -2    | -4      |
| 7  | 1        | 0                       | 5              | 7             | 100             | 0    | -2   | n/a  | -8   | 12   | 2     | 2       |
| 8  | 1        | 0                       | 4              | 3             | 100             | -4   | 2    | n/a  | 8    | 8    | 0     | 8       |
| 1  | 2        | 0                       | 10             | 1             | 100             | 2    | 8    | 2    | 4    | 4    | -4    | 0       |
| 9  | 2        | 0                       | 5              | 1             | 100             | 0    | -2   | 2    | -2   | 0    | 4     | -2      |
| 10 | 2        | 0                       | 4              | 1             | 100             | 0    | 2    | 8    | 24   | 0    | 0     | 0       |
| 11 | 2        | 0                       | 6              | 4             | 100             | 0    | 6    | 2    | 16   | 6    | 4     | -6      |
| 3  | 2        | 0                       | 8              | 2             | 100             | 0    | -4   | -6   | 16   | 10   | 2     | -16     |
| 12 | 2        | 0                       | 3              | 2             | 100             | -2   | -2   | -10  | -2   | -26  | -12   | -10     |
| 2  | 2        | 0                       | 2              | 5             | 100             | -4   | 8    | 12   | 12   | 0    | -2    | 4       |
| 6  | 2        | 0                       | 8              | 6             | 100             | 4    | 10   | 10   | 0    | 6    | -4    | 0       |
| 13 | 2        | 0                       | 10             | 6             | 100             | -4   | 2    | 10   | 6    | 8    | -4    | -4      |
| 4  | 2        | 0                       | 10             | 1             | 100             | 2    | -6   | -2   | 10   | -2   | 8     | -4      |
| 14 | 2        | 0                       | 9              | 4             | 100             | -2   | 4    | 2    | 4    | 6    | 14    | -2      |
| 15 | 2        | 0                       | 7              | 1             | 100             | -2   | 6    | 8    | 4    | 4    | -2    | -2      |
| 16 | 2        | 0                       | 5              | 4             | 100             | 4    | 4    | -2   | 8    | -14  | -12   | 2       |
| 17 | 2        | 0                       | 6              | 7             | 100             | 0    | 6    | 2    | 4    | 2    | -2    | 0       |
