# Supplementary material
Source: publisher figshare collection journal article supplement (https://asha.figshare.com/articles/dataset/_/25016471)
Supplement: Supplementary file 1 [file 1]

## Sheet: Raw data
R	Trial ID	DPS1000	DPS1500	DPS2000	DPS3000	DPS4000	DPS6000	DPS8000	BDP1000	BDP1500	BDP2000	BDP3000	BDP4000	BDP6000	BDP8000	BNoise1000	BNoise1500	BNoise2000	BNoise3000	BNoise4000	BNoise6000	BNoise8000	ADP1000	ADP1500	ADP2000	ADP3000	ADP4000	ADP6000	ADP8000	ANoise1000	ANoise1500	ANoise2000	ANoise3000	ANoise4000	ANoise6000	ANoise8000	RDP1000	RDP1500	RDP2000	RDP3000	RDP4000	RDP6000	RDP8000	RNoise1000	RNoise1500	RNoise2000	RNoise3000	RNoise4000	RNoise6000
1	1	-1.4	-1.1	-0.7	-0.1	0.8	3.2	2.3	12.5	17.6	16.9	10.9	6.7	-13.9	-25.3	-17.4	-20.2	-22.3	-25.7	-28.9	-32.6	-29.3	11.1	16.5	16.2	10.8	7.5	-10.7	-23	-16.9	-21.1	-23.3	-25.6	-28.1	-32.5	-30	11.1	16	14.9	8.8	10.5	-6.2	-15.5	-15.5	-17.5	-21.4	-24.6	-28.2	-31.2
2	1	-2.8	-3.8	-6.1	-4.9	-2.7	-2.5	-5.2	13	10.1	3.9	-2.8	8.1	-1.7	-10.9	-12.1	-18	-21.1	-24.1	-28	-31.7	-29	10.2	6.3	-2.2	-7.7	5.4	-4.2	-16.1	-11.2	-14.7	-19.7	-24.9	-27.9	-30.7	-29.3	10.9	10.7	4.9	-1.6	8.1	1.2	-9.8	-4.5	-4.1	-11.5	-21.7	-24.8	-26.8
3	1	-5.4	-7.7	-7.5	-0.8	-8.2	-4	-5.6	8.9	8.7	6.4	6.9	13.3	12.9	2.9	-9.9	-14.1	-19.9	-25.4	-29	-33.2	-30.7	3.5	1	-1.1	6.1	5.1	8.9	-2.7	-12.4	-13.9	-18.1	-24.3	-27.9	-31.6	-29.6
4	1	-2.3	-0.3	0	-0.2	-0.3	-1.7	-0.2	6.8	13.5	14.6	12.3	8	7.1	3.8	-9.5	-15.3	-21.8	-24.4	-28.9	-33.2	-30	4.5	13.2	14.6	12.1	7.7	5.4	3.6	-4.8	-14.9	-20.7	-24	-28.9	-31.3	-27.4	4.5	13.2	14.6	12.1	7.7	5.4	3.6	-4.8	-14.9	-20.7	-24	-28.9	-31.3
5	1	-5.8	-3.7	-2.3	-5	-5.8	-2.4	0.2	3.8	13.1	12.7	6.6	3.9	-9.3	-23.2	-15.4	-19.4	-22.4	-25.6	-27.7	-30.1	-28.1	-2	9.4	10.4	1.6	-1.9	-11.7	-23	-14.9	-16.9	-19.8	-24.5	-27.5	-30.9	-27.7	9.2	14.6	11.7	8.3	7.2	-0.4	-11.9	-12.8	-5.5	-20.2	-25.7	-28.2	-31.1
6	1	-0.9	-10.6	-6.5	-3.7	-6.2	0.2	10.4	3	17.1	13	7.8	11.1	5.9	-13.8	-0.3	3.1	-13.3	-20.8	-25.7	-29.2	-28.6	2.1	6.5	6.5	4.1	4.9	6.1	-3.4	-15.6	-20.4	-22.4	-24.3	-27.7	-30.4	-28.6	3.7	15.7	10.9	7.6	9.7	5.5	-12.7	-16.3	-18	-21.6	-25.9	-28.8	-30.8
7	1	-2.5	-2.1	-1.3	-0.5	-0.8	-2.9	-2.2	4.1	14.6	10.5	6.4	5.5	-0.4	4.3	-16.5	-16.8	-20.8	-24.7	-28.2	-29.8	-28.2	1.6	12.5	9.2	5.9	4.7	-3.3	2.1	-13.5	-16.8	-22.7	-26.5	-28.8	-30.6	-28.9	2.7	12.5	8.7	4.7	7.4	-1.1	4.7
8	1	-3.1	-0.4	0.6	3.1	-3.4	-3.6	-2	5	10.6	2.9	-1.5	5.3	9.6	-0.4	-14.2	-17.8	-21.8	-24.2	-28.2	-31.6	-28.6	1.9	10.2	3.5	1.6	1.9	6	-2.4	-9.5	-15.1	-20.8	-24.9	-25.8	-28.9	-28.9	5	10.2	3.5	1.6	3.9	9.4	-2.4	-9.5	-15.1	-20.8	-24.9	-25.8	-28.9
1	2	2.5	1.1	1.3	1.9	-3.7	-15.6	-10.3	8.1	14.8	14.3	6.2	9.1	3.7	-13.1	-17.1	-17.9	-21	-25.1	-29.2	-30.1	-28.4	10.6	15.9	15.6	8.1	5.4	-11.9	-23.4	-13.9	-16.9	-21.7	-25.2	-28.6	-31.9	-29.6	13	17.4	15.5	10	10.4	2	-13.3	-19.3	-18.6	-21.9	-25.1	-29.3	-21.7
9	2	2.6	-0.1	2.7	1.9	-1.6	-3.7	-1.4	-7.4	-0.2	-5.1	-1.9	3.6	2.2	-8.8	-15.6	-18.5	-23.1	-26.4	-27.1	-31.4	-29.1	-4.8	-0.3	-2.4	0	2	-1.5	-10.2	-16	-18.1	-21.3	-26	-27.7	-31.1	-29.4	-1.6	3.1	-1.9	-1.3	3.7	5.9	-6.1	-14.4	-16.7	-21.2	-25.1	-29.2	-31.8
10	2	-1	-1.5	-3.5	-2.8	-1.7	-4	-2.8	12.2	7.8	7.9	1.4	4.3	2	-9.2	-15.3	-17.7	-20.7	-25.1	-28.3	-31.6	-28.9	11.2	6.3	4.4	-1.4	2.6	-2	-12								11.5	7.5	7.7	2.1	5	1.3	-8.1
11	2	-1.7	-0.2	-1	-1.4	-5.5	-7.4	-2.8	4.9	8.9	5.4	3.1	-1.5	-1.3	-7.4	-18	-20.2	-21.8	-26	-29	-31.3	-29.8	3.2	8.7	4.4	1.7	-7	-8.7	-10.2	-13.2	-14.6	-18.7	-22.8	-26.4	-28.5	-28	5.2	8.8	7.3	4.2	0.1	-3	-10.4	-15.8	-15.4	-19.3	-23.1	-27.1	-30.7
3	2	-0.4	-1.5	-0.2	0.7	-0.4	-3.9	-5.5	12.1	12.2	7.2	7.4	13.3	11.6	6.1	-13.2	-14.7	-20.7	-24.1	-27.6	-32	-29.1	11.7	10.7	7	8.1	12.9	7.7	0.6								10.8	11.3	7.9	6.8	12.5	11	4.3
12	2	10.9	1.7	-0.1	-2.4	-1.6	-3.6	4.9	-9.2	4.5	0.1	8.1	5	-4.1	-20.4	-3.7	-12.2	-15.6	-24.6	-26.8	-30.7	-28.6	1.7	6.2	0	5.7	3.4	-7.7	-15.5	-6.5	-11.2	-17.2	-24.8	-28	-31.9	-30	-4.1	5	2.4	7	4.4	-1.3	-14.6	-7.3	-13.7	-16.9	-23.3	-28	-29.9
2	2	2.1	1.8	-1.2	-1.6	-1.7	-3.5	-4.7	10.8	7.3	2.2	-5.6	6.8	0.1	-7.8	-14.6	-17.5	-20.5	-24.4	-27.5	-31.3	-28.8	12.9	9.1	1	-7.2	5.1	-3.4	-12.5	-5.5	-14.3	-18	-25.8	-27.9	-31.1	-29.9	10.7	7.6	4	-4.8	6.4	0.2	-9	-13.5	-20	-21.2	-24.7	-26.9	-30.9
6	2	2.3	-2.3	-2.9	-2.9	-2.4	-2.4	-3.8	3.7	13.7	10.1	7.6	9.7	-1.3	-21	-6	-4.2	-15.1	-24	-28.3	-32.4	-30.7	6	11.4	7.2	4.7	7.3	-3.7	-24.8	-16.3	-18	-21.6	-25.9	-28.8	-30.8	-29.8	6.7	11.7	9.7	8.5	7.6	-1.2	-16.4	-13	-18.5	-19.9	-24.1	-27.7	31.4
13	2	-1.8	-2.6	-1.5	-0.1	-1.6	-2.3	-3.2	4	11.4	14.3	8.8	9.4	10.4	0.3	-9.1	-14.6	-18.1	-24.6	-26.6	-31.9	-28.8	2.2	8.8	12.8	8.7	7.8	8.1	-2.9	-10.7	-9.2	-17.7	-24.3	-27	-32.3	-29.4	5.2	11.6	13.7	8.5	9.4	10	0	-13.5	-18.7	-23.4	-25.8	-28.3	-31.3
4	2	2.2	-1.5	-0.7	-1.2	-1.6	-1.6	-0.1	0.5	13.9	14.5	10.4	5.1	6.5	11.5	-7.4	-9.1	-19.2	-24.9	-28.1	-32.2	-30	2.7	12.4	13.8	9.2	3.5	4.9	11.4	-7.7	-14.9	-22.6	-25.4	-27.7	-32.6	-29.3	2.7	12.4	13.8	9.2	6.5	9.1	11.4	-7.7	-14.9	-22.6	-25.4	-27.7	-32.6
14	2	0.8	0.5	0	-0.1	-0.3	-2.1	-3.2	11.6	19.5	13.1	10.2	0.7	-0.5	-9.3	-17.1	-22	-23.3	-26.5	-29.4	-32.6	-28.9	12.4	20	13.1	10.1	0.4	-2.6	-12.5	-18.7	-19.9	-20.7	-25.6	-27.9	-30.8	-29.6	12.1	20.2	13.7	10.8	1.6	-0.1	-8.2	-14.2	-18.1	-21.3	-25.1	-28	-31
15	2	-2.4	-1.3	-0.2	-2.5	-1.9	-2.9	-1.4	8	6.4	11.6	10.4	3.8	12.6	5	-14.4	-19.6	-23.8	-25.5	-28	-31.2	-29	5.6	5.1	11.4	7.9	1.9	9.7	3.6	-13.1	-17.6	-22.9	-24	-27.8	-31.4	-28.1	6.2	7.2	12.8	10.2	2.6	10.9	3.6	-14	-19.7	-21.2	-24.7	-29.5	-32.6
16	2	13.9	1.5	-5.8	-9.7	-10.2	-10.4	-5	-18.2	-14.1	-5	-12.5	-5.6	-6.9	-16.7	-7.4	-17.4	-20.6	-25.7	-28	-29.8	-30	-4.3	-12.6	-10.8	-22.2	-15.8	-17.3	-21.7	-9.6	-18.3	-20.3	-23.7	-28.1	-30.3	-29.1	-12.9	-12.6	-5.6	-9.5	-2.9	-4.8	-14.5	-8.3	-14.4	-16.6	-24.7	-27.6	-29.4
17	2	-7.1	-4.1	-7.9	-3.1	-1.5	-6.2	-4.6	5.7	10.8	6.7	7	8.5	8.4	4.1	-11.5	-15.7	-19.6	-24.7	-26	-32.2	-28.2	-2	1.7	-5.6	-5.4	-1.2	-1.5	-6.6	-2.4	-7.8	-12.1	-21.7	-27.2	-31.6	-29.1	5.5	6.5	3.9	-0.3	0.8	4.6	-4	-13.6	-19.3	-22.5	-27.2	-29.7	-32.7
																							2.2
[truncated: 1 more columns]

## Sheet: ReadMe
	missing data
BDP1000L	BDP	Baseline DP amplitude in dB SPL
	1000	Frequency of measurement
BNoise1000	After exposure Noise	noise levels in DB SPL
	1000	Frequency of measurement
ADP1000	ADP	After exposure DP amplitude in dB SPL
	1000	Frequency of measurement
ANoise1000	ANoise	After exposure noise levels in DB SPL
	1000	Frequency of measurement
RDP1000	RDP	Recovery DP amplitudein dB SPL
	1000	Frequency of measurement
RNoise1000	RNoise	Recovery noise levels in DB SPL
	1000	Frequency of measurement
DPS1000	DPS	DP amplitude shift
	1000	Frequency of measurement
