# Supplementary material
Source: publisher figshare collection journal article supplement (https://asha.figshare.com/articles/dataset/_/25016471)
Supplement: Supplementary file 2 [file 1]

**Supplemental Material S3.** Ultimate PTA threshold shift per frequency for the second part of the experimental study. PTA thresholds have returned within 4 dB from baseline for all participants.

| ID | 1-KHZ<br>ULTIMATE<br>THRESHOLD<br>SHIFT | 3-KHZ<br>ULTIMATE<br>THRESHOLD<br>SHIFT | 4-KHZ<br>ULTIMATE<br>THRESHOLD<br>SHIFT | 6-KHZ<br>ULTIMATE<br>THRESHOLD<br>SHIFT | 8-KHZ<br>ULTIMATE<br>THRESHOLD<br>SHIFT | 10-KHZ<br>ULTIMATE<br>THRESHOLD<br>SHIFT | 12.5-KHZ<br>ULTIMATE<br>THRESHOLD<br>SHIFT |
|----|-----------------------------------------|-----------------------------------------|-----------------------------------------|-----------------------------------------|-----------------------------------------|------------------------------------------|--------------------------------------------|
| 1  | 2                                       | 4                                       | 2                                       | -4                                      | -2                                      | 2                                        | -2                                         |
| 9  | 2                                       | 0                                       | 0                                       | -12                                     | 0                                       | -2                                       | -4                                         |
| 10 | 2                                       | -6                                      | 0                                       | 4                                       | -12                                     | 0                                        | 2                                          |
| 11 | -2                                      | -6                                      | -12                                     | 2                                       | 0                                       | 0                                        | -2                                         |
| 3  | -4                                      | -6                                      | -12                                     | 2                                       | 0                                       | 0                                        | -2                                         |
| 12 | 0                                       | -4                                      | -8                                      | -4                                      | -16                                     | -22                                      | -24                                        |
| 2  | -10                                     | -8                                      | 2                                       | -4                                      | -6                                      | -8                                       | -32                                        |
| 6  | -6                                      | -12                                     | -4                                      | -10                                     | 0                                       | 0                                        | 0                                          |
| 13 | 0                                       | 0                                       | 0                                       | -2                                      | -4                                      | -8                                       | -16                                        |
| 4  | 4                                       | 2                                       | 0                                       | 0                                       | 0                                       | 0                                        | 0                                          |
| 14 | -2                                      | 2                                       | -2                                      | 0                                       | 2                                       | 2                                        | 2                                          |
| 15 | -2                                      | 2                                       | -10                                     | -4                                      | -2                                      | -4                                       | 0                                          |
| 16 | 4                                       | 0                                       | 2                                       | -2                                      | -2                                      | -10                                      | -4                                         |
| 17 | -16                                     | -2                                      | -10                                     | 0                                       | -4                                      | -20                                      | -18                                        |
