# Supplementary material
Source: publisher figshare collection journal article supplement (https://asha.figshare.com/articles/dataset/_/25016471)
Supplement: Supplementary file 3 [file 1]

**Supplemental Material S2.** Ultimate PTA threshold shift per frequency for the first part of the experimental study. PTA thresholds have returned within 4 dB from baseline for all participants.

| ID | 1-KHZ<br>ULTIMATE<br>THRESHOLD<br>SHIFT | 3-KHZ<br>ULTIMATE<br>THRESHOLD<br>SHIFT | 6-KHZ<br>ULTIMATE<br>THRESHOLD<br>SHIFT | 8-KHZ<br>ULTIMATE<br>THRESHOLD<br>SHIFT | 10-KHZ<br>ULTIMATE<br>THRESHOLD<br>SHIFT | 12.5-KHZ<br>ULTIMATE<br>THRESHOLD<br>SHIFT |
|----|-----------------------------------------|-----------------------------------------|-----------------------------------------|-----------------------------------------|------------------------------------------|--------------------------------------------|
| 1  | -4,00                                   | -4,00                                   | -12,00                                  | 0,00                                    | 0,00                                     | -8,00                                      |
| 2  | -2,00                                   | 2,00                                    | 4,00                                    | 4,00                                    | 2,00                                     | -2,00                                      |
| 3  | 2,00                                    | 2,00                                    | -2,00                                   | 2,00                                    | -12,00                                   | -10,00                                     |
| 4  | 0,00                                    | -2,00                                   | -2,00                                   | 0,00                                    | -2,00                                    | -6,00                                      |
| 5  | 2,00                                    | 2,00                                    | -10,00                                  | -16,00                                  | -4,00                                    | -4,00                                      |
| 6  | 0,00                                    | 2,00                                    | -10,00                                  | 2,00                                    | -2,00                                    | -4,00                                      |
| 7  | 0,00                                    | -2,00                                   | -8,00                                   | 0,00                                    | 2,00                                     | 2,00                                       |
| 8  | -6,00                                   | 0,00                                    | -4,00                                   | 0,00                                    | 0,00                                     | 0,00                                       |
